# Supplementary material
Source: publisher figshare collection journal article supplement (https://karger.figshare.com/ndownloader/files/17867408)
Supplement: Supplementary file 1 [file 17867408]

**SUPPLEMENTARY INFORMATION**

**TITLE:** Validation of the ILD-GAP Model and a local nomogram in a Singaporean Cohort

**Authors’ names:** Michelle Li Wei Kam1, Hui Hua Li2, Yi Hern Tan1, Su Ying Low1

**Authors’ affiliation(s):** 1Department of Respiratory and Critical Care Medicine, Singapore General Hospital, 2Health Service Research Unit, Singapore General Hospital

**Suppl. Table S1. Univariable analysis of overall mortality**

|  | No of mortalities | No of patients | HR (95% CI) | P value |
| --- | --- | --- | --- | --- |
| Age, years | 48 | 181 | 1.05 (1.02, 1.08) | 0.0021 |
| FVC, % predicted |  |  |  |  |
| >75% | 5 | 41 | Reference |  |
| 50~75% | 27 | 95 | 2.37 (0.91, 6.17) | 0.0763 |
| <50% | 16 | 45 | 3.75 (1.37, 10.25) | 0.0099 |
| DLCO, % predicted |  |  |  |  |
| >55% | 2 | 54 | Reference |  |
| 36~55% | 16 | 55 | 8.38 (1.93, 36.44) | 0.0046 |
| <=35% | 13 | 26 | 14.38 (3.24, 63.8) | 0.0005 |
| Cannot perform | 17 | 46 | 12.94 (2.98, 56.09) | 0.0006 |
| 6MWD*, meters | 7 | 33 | 0.99 (0.98, 1.01) | 0.2784 |
| PASP†, mmHg | 28 | 79 | 1.02 (1, 1.04) | 0.0157 |
| LVEF‡, mmHg | 33 | 102 | 0.97 (0.93, 1) | 0.0694 |
| ILD Type |  |  |  |  |
| IPF | 20 | 54 | Reference |  |
| Unclassified ILD | 4 | 5 | 3.12 (1.06, 9.23) | 0.0395 |
| CTD-ILD/ NSIP | 23 | 112 | 0.46 (0.25, 0.84) | 0.0113 |
| Chronic HP | 1 | 10 | 0.32 (0.04, 2.43) | 0.2729 |
| Male Gender | 38 | 109 | 2.95 (1.47, 5.94) | 0.0024 |
| Diabetes Mellitus | 18 | 54 | 1.57 (0.87, 2.82) | 0.1351 |
| Hypertension | 30 | 91 | 1.67 (0.93, 2.99) | 0.0873 |
| Hyperlipidemia | 28 | 95 | 1.08 (0.61, 1.92) | 0.7920 |
| IHD§ | 15 | 39 | 1.74 (0.94, 3.2) | 0.0770 |
| CTD ll | 2 | 60 | 0.07 (0.02, 0.27) | 0.0002 |
| Tuberculosis | 1 | 8 | 0.71 (0.10, 5.17) | 0.7368 |
| Cancer | 3 | 11 | 0.73 (0.23, 2.37) | 0.6055 |
| Smoking status |  |  |  |  |
| Non-smoker | 28 | 109 | Reference |  |
| Smoker | 3 | 20 | 0.56 (0.17, 1.85) | 0.3420 |
| Ex-smoker | 17 | 52 | 1.43 (0.78, 2.61) | 0.2471 |
| ILD-GAP Stage | 48 | 181 | 1.67 (1.43, 1.96) | <0.0001 |

*6MWD: 6 Minute Walk Test Distance

†PASP: Pulmonary Artery Systolic Pressure

‡LVEF: Left Ventricular Ejection Fraction

§IHD: Ischemic Heart Disease

ll CTD: Connective Tissue Disease

|  | Actual mortality (%) | Nomogram predicted mortality (%) | ILD-GAP predicted mortality (%) | | | |
| --- | --- | --- | --- | --- | --- | --- |
| 0-1 | 2-3 | 4-5 | >5 | |
| 1-year mortality | 20.5 | 7.2 | 3.1 | 8.8 | 18.2 | 33.5 | |
| 2-year mortality | 28.0 | 11.1 | 6.6 | 18.0 | 35.0 | 58.4 | |
| 3-year mortality | 34.4 | 15.2 | 10.2 | 26.9 | 49.2 | 74.8 | |

**Suppl. Table S2. Comparison of mortality predicted by ILD-GAP and the nomogram against actual mortality**
